# Supplementary material
Source: PubMed Central journal article supplement (PMC7246140)

**Appendix**  
**E-Cigarette and Cigarette Use Among U.S. Adolescents: Longitudinal Associations With Marijuana Use and Perceptions**  
**Evans-Polce et al.**

**Appendix Figure 1.** Description of the analytic sample.

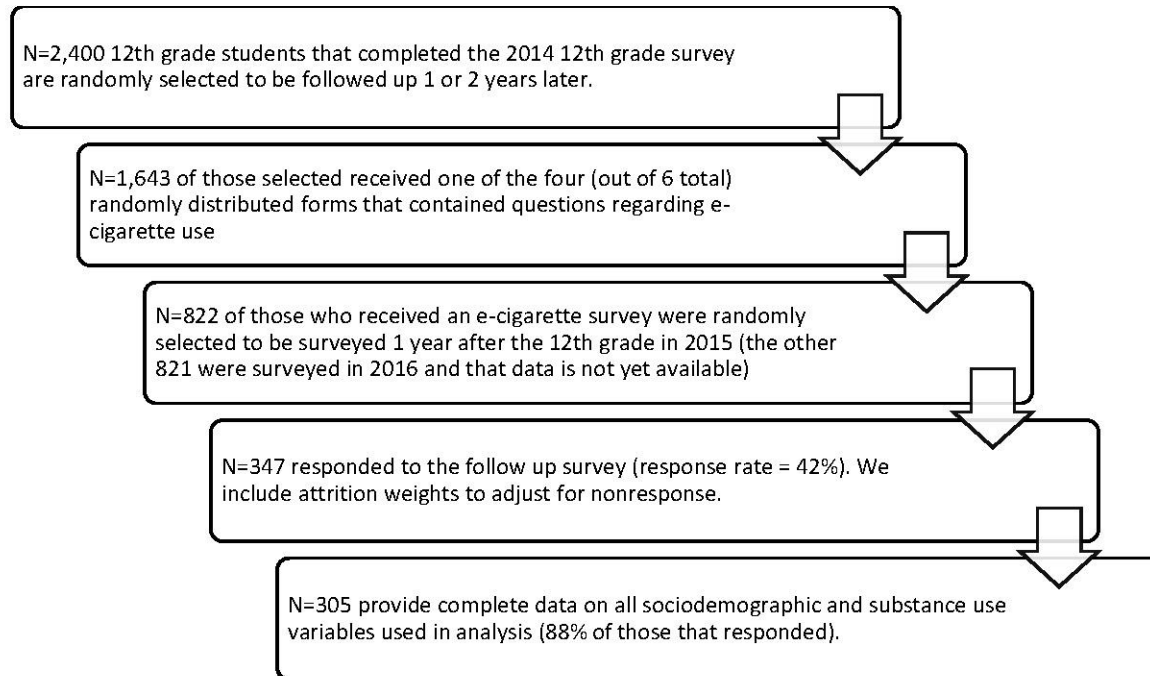

Supplement: NIHMS1578405-supplement-1.pdf [file NIHMS1578405-supplement-1.pdf]
